# Supplementary material
Source: PubMed Central journal article supplement (PMC7211919)
Supplement: pnas.1918373117.sapp.pdf [file pnas.1918373117.sapp.pdf]

# PNAS

[www.pnas.org](http://www.pnas.org)

Supplementary Information for

Reconciling global priorities for conserving biodiversity habitat

K. Mokany, S. Ferrier, T.D. Harwood, C. Ware, M. Di Marco, H.S. Grantham, O. Venter, A.J. Hoskins, J.E.M. Watson

Karel Mokany  
Email: [Karel.Mokany@csiro.au](mailto:Karel.Mokany@csiro.au)

**This PDF file includes:**

Figures S1 to S3

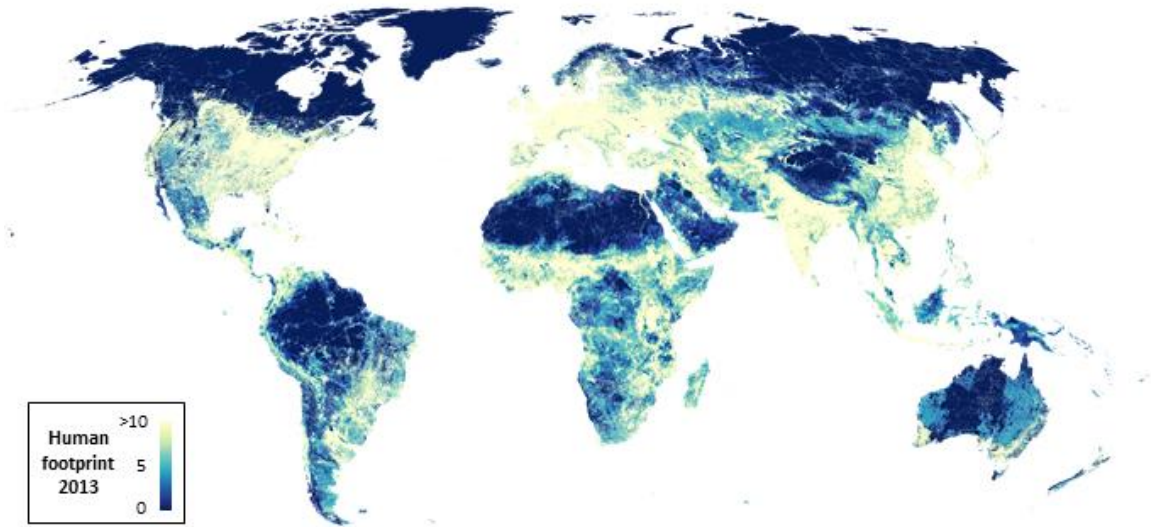

**Fig. S1.** The human footprint on the terrestrial environment, as applied in the present analysis. This layer was developed as described in Venter *et al.* (22) but incorporating updated datasets centered on the year 2013. Note that the color ramp scales from 0 to 10, with all human footprint values greater than 10 shown as the same color.

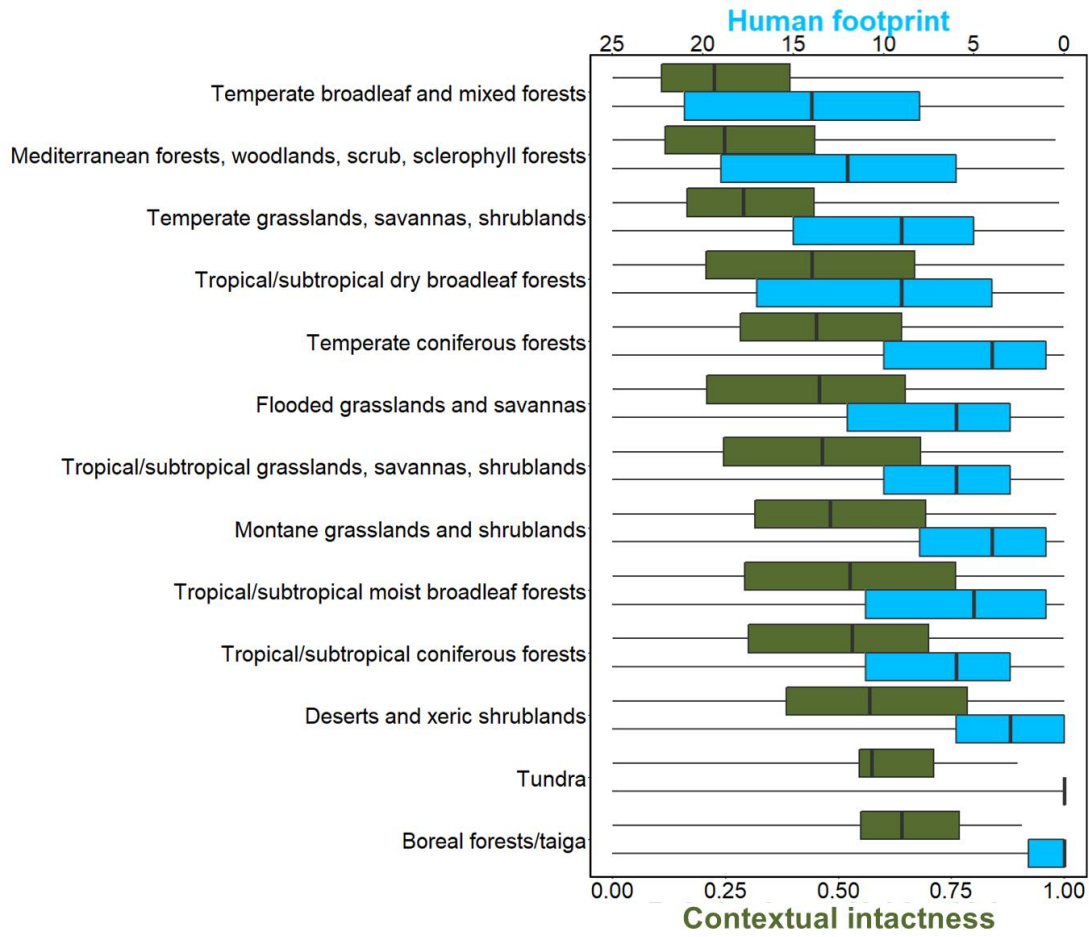

**Fig. S2.** Distribution of contextual intactness and human footprint across the world's terrestrial biomes. Biomes are ordered based on increasing median contextual intactness.

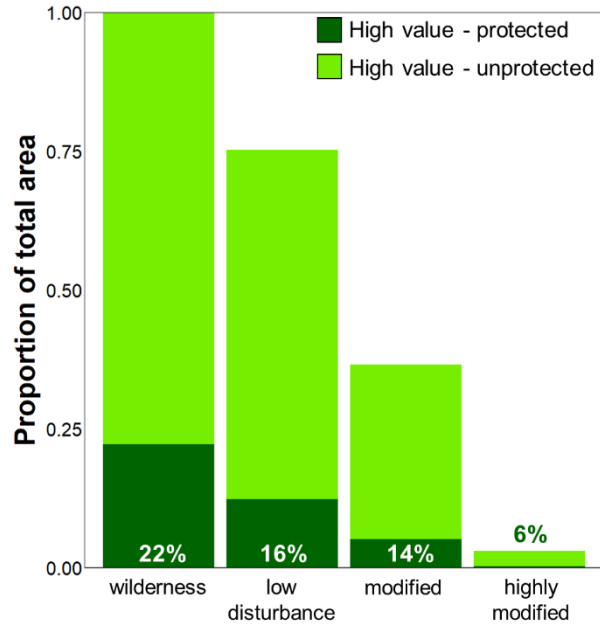

**Fig. S3.** The proportion of high-value habitat (contextual intactness > 0.5) in each of four major levels of human footprint. Also shown is the amount of high-value habitat within protected areas, including the percentage of that coverage.
